# Supplementary material for: Stability of amino acids and related amines in human serum under different preprocessing and pre-storage conditions based on iTRAQ®-LC-MS/MS
Source: PubMed Central journal article supplement (PMC7928226; doi:10.1242/bio.055020), 2021-02-26
Supplement: biolopen-10-055020-s1.pdf [file biolopen-10-055020-s1.pdf]

**Table S1** The concentration and change ratio of 17 amino acids which changed significantly ( $p < 0.05$ ) after serum specimens incubated at 4 °C for 24h.

| Temperature and delay time | Analyte ( $\mu\text{mol/L}$ ) |            |             |            |             |             |             |             |             |             |             |            |             |            |             |             |             |
|----------------------------|-------------------------------|------------|-------------|------------|-------------|-------------|-------------|-------------|-------------|-------------|-------------|------------|-------------|------------|-------------|-------------|-------------|
|                            | His                           | Leu        | Lys         | Phe        | Trp         | Val         | Gly         | Ser         | Tau         | Asp         | Glu         | Cys        | Ala         | bAla       | 3MHis       | PEtN        | Pro         |
| 0h-1                       | 61.02                         | 80.82      | 108.65      | 54.64      | 30.33       | 160.47      | 236.42      | 145.47      | 36.09       | 2.24        | 7.45        | 112.17     | 216.87      | 11.88      | 1.85        | 1.29        | 117.91      |
| 0h-2                       | 57.85                         | 88.25      | 101.16      | 51.86      | 34.72       | 163.05      | 237.33      | 140.03      | 38.34       | 1.34        | 9.71        | 78.64      | 299.41      | 10.57      | 2.30        | 1.53        | 108.97      |
| 0h-3                       | 46.26                         | 103.85     | 92.96       | 62.05      | 39.45       | 181.50      | 295.67      | 187.40      | 52.97       | 0.68        | 14.01       | 79.71      | 343.24      | 15.52      | 2.61        | 1.79        | 96.49       |
| 0h-4                       | 31.91                         | 96.34      | 106.79      | 55.82      | 36.46       | 166.28      | 200.44      | 157.07      | 41.78       | 2.16        | 9.55        | 115.24     | 276.87      | 10.01      | 2.06        | 1.77        | 124.27      |
| mean                       | 49.26                         | 92.31      | 102.39      | 56.09      | 35.24       | 167.82      | 242.47      | 157.49      | 42.29       | 1.60        | 10.18       | 96.44      | 284.10      | 12.00      | 2.20        | 1.59        | 111.91      |
| SD                         | 13.19                         | 9.96       | 7.05        | 4.31       | 3.81        | 9.42        | 39.41       | 21.17       | 7.49        | 0.74        | 2.76        | 19.98      | 52.61       | 2.47       | 0.32        | 0.24        | 12.04       |
| 4°C-1h-1                   | 75.78                         | 73.27      | 116.15      | 50.00      | 36.20       | 141.02      | 290.14      | 187.76      | 52.39       | 0.75        | 7.60        | 76.29      | 255.77      | 2.19       | 3.44        | 1.45        | 84.74       |
| 4°C-1h-2                   | 74.43                         | 91.29      | 130.33      | 54.01      | 44.53       | 142.86      | 302.63      | 194.04      | 64.58       | 2.72        | 7.33        | 70.35      | 260.08      | 3.41       | 0.00        | 1.09        | 64.92       |
| 4°C-1h-3                   | 52.81                         | 87.30      | 171.72      | 53.51      | 40.30       | 152.14      | 323.08      | 159.37      | 63.01       | 1.63        | 11.52       | 57.46      | 342.91      | 3.43       | 1.68        | 0.87        | 85.95       |
| 4°C-1h-4                   | 65.88                         | 77.92      | 145.25      | 54.37      | 37.12       | 159.51      | 282.61      | 132.67      | 55.61       | 1.27        | 6.92        | 59.51      | 293.22      | 4.40       | 1.11        | 1.39        | 73.61       |
| mean                       | 67.23                         | 82.44      | 140.86      | 52.97      | 39.54       | 148.88      | 299.61      | 168.46      | 58.90       | 1.59        | 8.34        | 65.90      | 287.99      | 3.36       | 2.08        | 1.20        | 77.30       |
| SD                         | 10.56                         | 8.30       | 23.76       | 2.01       | 3.76        | 8.60        | 17.69       | 28.23       | 5.84        | 0.83        | 2.14        | 8.94       | 40.25       | 0.90       | 1.44        | 0.27        | 9.95        |
| T-test                     | 0.05                          | 0.14       | 0.08        | 0.26       | 0.15        | 0.03        | 0.02        | 0.65        | 0.02        | 0.99        | 0.07        | 0.06       | 0.83        | 0.01       | 0.48        | 0.17        | 0.03        |
| <b>change ratio (%)</b>    | <b>136%</b>                   | <b>89%</b> | <b>138%</b> | <b>94%</b> | <b>112%</b> | <b>89%</b>  | <b>124%</b> | <b>107%</b> | <b>139%</b> | <b>99%</b>  | <b>82%</b>  | <b>68%</b> | <b>101%</b> | <b>28%</b> | <b>94%</b>  | <b>75%</b>  | <b>69%</b>  |
| 4°C-2h-1                   | 71.22                         | 74.72      | 95.66       | 44.48      | 32.15       | 160.17      | 247.01      | 130.19      | 34.27       | 3.26        | 10.15       | 81.33      | 265.86      | 7.50       | 2.80        | 1.47        | 108.77      |
| 4°C-2h-2                   | 76.53                         | 85.19      | 110.45      | 48.90      | 32.06       | 161.86      | 336.76      | 130.21      | 41.16       | 3.74        | 10.68       | 75.31      | 292.72      | 11.03      | 3.24        | 1.47        | 147.30      |
| 4°C-2h-3                   | 35.97                         | 86.59      | 119.32      | 54.06      | 35.92       | 134.26      | 323.99      | 125.14      | 47.44       | 2.58        | 8.32        | 74.89      | 330.49      | 3.07       | 1.59        | 1.54        | 82.88       |
| 4°C-2h-4                   | 57.25                         | 115.55     | 160.42      | 62.50      | 41.53       | 213.97      | 361.37      | 194.75      | 50.75       | 4.12        | 18.46       | 125.96     | 458.15      | 13.76      | 0.00        | 2.16        | 140.86      |
| mean                       | 60.24                         | 90.51      | 121.46      | 52.48      | 35.41       | 167.56      | 317.28      | 145.07      | 43.40       | 3.43        | 11.90       | 89.37      | 336.80      | 8.84       | 2.55        | 1.66        | 119.95      |
| SD                         | 18.11                         | 17.51      | 27.74       | 7.74       | 4.46        | 33.42       | 49.35       | 33.21       | 7.27        | 0.66        | 4.49        | 24.57      | 85.13       | 4.62       | 1.45        | 0.33        | 29.91       |
| T-test                     | 0.25                          | 0.83       | 0.27        | 0.41       | 0.94        | 0.99        | 0.12        | 0.59        | 0.75        | 0.01        | 0.61        | 0.47       | 0.33        | 0.44       | 0.72        | 0.66        | 0.55        |
| <b>change ratio (%)</b>    | <b>122%</b>                   | <b>98%</b> | <b>119%</b> | <b>94%</b> | <b>100%</b> | <b>100%</b> | <b>131%</b> | <b>92%</b>  | <b>103%</b> | <b>214%</b> | <b>117%</b> | <b>93%</b> | <b>119%</b> | <b>74%</b> | <b>116%</b> | <b>104%</b> | <b>107%</b> |

|                         |             |             |             |             |             |             |             |             |             |             |             |             |             |             |             |            |             |
|-------------------------|-------------|-------------|-------------|-------------|-------------|-------------|-------------|-------------|-------------|-------------|-------------|-------------|-------------|-------------|-------------|------------|-------------|
| 4°C-4h-1                | 65.80       | 78.19       | 120.38      | 45.90       | 28.57       | 129.41      | 246.65      | 124.79      | 36.72       | 3.07        | 12.60       | 62.30       | 299.31      | 13.99       | 1.53        | 1.62       | 81.63       |
| 4°C-4h-2                | 46.35       | 90.93       | 136.74      | 57.50       | 42.40       | 184.39      | 285.31      | 109.98      | 45.38       | 6.58        | 10.75       | 97.26       | 358.29      | 12.59       | 2.66        | 1.23       | 173.30      |
| 4°C-4h-3                | 67.81       | 97.15       | 105.77      | 53.44       | 33.31       | 160.26      | 294.43      | 172.18      | 46.82       | 4.04        | 10.19       | 64.86       | 417.76      | 12.24       | 2.85        | 1.62       | 108.62      |
| 4°C-4h-4                | 75.35       | 107.03      | 135.68      | 61.02       | 39.69       | 212.86      | 363.39      | 149.62      | 44.98       | 4.63        | 12.69       | 163.83      | 404.64      | 13.99       | 2.87        | 1.06       | 93.69       |
| mean                    | 63.83       | 93.32       | 124.64      | 54.46       | 35.99       | 171.73      | 297.45      | 139.14      | 43.47       | 4.58        | 11.56       | 97.06       | 370.00      | 13.20       | 2.48        | 1.38       | 114.31      |
| SD                      | 12.36       | 12.07       | 14.64       | 6.50        | 6.25        | 35.47       | 48.60       | 27.43       | 4.57        | 1.48        | 1.27        | 47.27       | 53.59       | 0.92        | 0.64        | 0.28       | 40.85       |
| T-test                  | 0.30        | 0.81        | 0.03        | 0.72        | 0.82        | 0.84        | 0.24        | 0.03        | 0.70        | 0.05        | 0.53        | 0.98        | 0.01        | 0.50        | 0.33        | 0.40       | 0.92        |
| <b>change ratio (%)</b> | <b>130%</b> | <b>101%</b> | <b>122%</b> | <b>97%</b>  | <b>102%</b> | <b>102%</b> | <b>123%</b> | <b>88%</b>  | <b>103%</b> | <b>286%</b> | <b>114%</b> | <b>101%</b> | <b>130%</b> | <b>110%</b> | <b>112%</b> | <b>87%</b> | <b>102%</b> |
| 4°C-8h-1                | 47.71       | 86.44       | 104.07      | 55.62       | 32.18       | 156.82      | 179.13      | 133.26      | 43.59       | 6.74        | 13.26       | 89.86       | 222.40      | 13.05       | 3.16        | 0.96       | 135.75      |
| 4°C-8h-2                | 42.22       | 88.95       | 130.04      | 47.45       | 36.07       | 173.81      | 254.51      | 111.25      | 33.43       | 5.54        | 12.84       | 60.63       | 234.01      | 17.31       | 1.86        | 1.20       | 109.65      |
| 4°C-8h-3                | 59.04       | 101.98      | 123.23      | 55.05       | 33.23       | 142.54      | 249.41      | 123.63      | 44.40       | 5.89        | 11.14       | 61.15       | 402.51      | 11.87       | 3.09        | 1.09       | 144.71      |
| 4°C-8h-4                | 61.67       | 99.05       | 130.34      | 60.49       | 32.76       | 149.00      | 229.41      | 169.59      | 42.58       | 7.81        | 15.20       | 86.86       | 314.57      | 11.33       | 3.83        | 1.17       | 135.45      |
| mean                    | 52.66       | 94.11       | 121.92      | 54.65       | 33.56       | 155.54      | 228.11      | 134.43      | 41.00       | 6.50        | 13.11       | 74.62       | 293.37      | 13.39       | 2.98        | 1.10       | 131.39      |
| SD                      | 9.23        | 7.57        | 12.35       | 5.39        | 1.73        | 13.50       | 34.41       | 25.11       | 5.10        | 1.01        | 1.67        | 15.91       | 83.51       | 2.71        | 0.82        | 0.11       | 15.12       |
| T-test                  | 0.78        | 0.34        | 0.10        | 0.62        | 0.46        | 0.33        | 0.56        | 0.25        | 0.74        | 0.00        | 0.24        | 0.00        | 0.76        | 0.56        | 0.21        | 0.01       | 0.15        |
| <b>change ratio (%)</b> | <b>107%</b> | <b>102%</b> | <b>119%</b> | <b>97%</b>  | <b>95%</b>  | <b>93%</b>  | <b>94%</b>  | <b>85%</b>  | <b>97%</b>  | <b>405%</b> | <b>129%</b> | <b>77%</b>  | <b>103%</b> | <b>112%</b> | <b>135%</b> | <b>69%</b> | <b>117%</b> |
| 4°C-12h-1               | 85.78       | 98.95       | 80.54       | 66.52       | 38.09       | 180.57      | 282.61      | 193.84      | 41.18       | 10.94       | 20.91       | 99.06       | 495.80      | 11.18       | 2.01        | 1.24       | 162.52      |
| 4°C-12h-2               | 60.78       | 101.02      | 169.23      | 70.98       | 44.27       | 176.26      | 349.61      | 257.40      | 47.79       | 11.45       | 23.38       | 69.08       | 316.25      | 19.59       | 2.90        | 1.00       | 125.74      |
| 4°C-12h-3               | 73.89       | 97.04       | 203.76      | 58.64       | 31.78       | 206.02      | 306.36      | 176.70      | 54.19       | 9.58        | 19.01       | 107.41      | 281.11      | 13.35       | 2.26        | 1.12       | 172.17      |
| 4°C-12h-4               | 63.40       | 108.90      | 110.00      | 68.42       | 39.14       | 214.29      | 464.29      | 166.93      | 44.61       | 9.16        | 18.28       | 71.92       | 443.96      | 16.31       | 4.19        | 0.89       | 138.89      |
| mean                    | 70.96       | 101.48      | 140.88      | 66.14       | 38.32       | 194.28      | 350.72      | 198.72      | 46.94       | 10.28       | 20.39       | 86.87       | 384.28      | 15.11       | 2.84        | 1.06       | 149.83      |
| SD                      | 11.39       | 5.21        | 55.83       | 5.32        | 5.13        | 18.71       | 80.63       | 40.67       | 5.54        | 1.09        | 2.28        | 19.24       | 102.09      | 3.65        | 0.98        | 0.15       | 21.29       |
| T-test                  | 0.04        | 0.19        | 0.31        | 0.13        | 0.48        | 0.04        | 0.15        | 0.24        | 0.08        | 0.00        | 0.02        | 0.56        | 0.28        | 0.33        | 0.32        | 0.06       | 0.08        |
| <b>change ratio (%)</b> | <b>144%</b> | <b>110%</b> | <b>138%</b> | <b>118%</b> | <b>109%</b> | <b>116%</b> | <b>145%</b> | <b>126%</b> | <b>111%</b> | <b>641%</b> | <b>200%</b> | <b>90%</b>  | <b>135%</b> | <b>126%</b> | <b>129%</b> | <b>67%</b> | <b>134%</b> |
| 4°C-24h-1               | 92.06       | 108.00      | 149.52      | 62.22       | 40.20       | 203.95      | 339.24      | 200.80      | 48.57       | 7.40        | 26.35       | 96.04       | 401.99      | 8.15        | 2.64        | 0.70       | 197.16      |
| 4°C-24h-2               | 94.55       | 118.46      | 124.90      | 73.80       | 42.86       | 188.68      | 339.29      | 128.90      | 49.77       | 17.23       | 26.33       | 135.08      | 401.34      | 8.55        | 4.07        | 0.65       | 162.66      |
| 4°C-24h-3               | 84.04       | 106.33      | 101.27      | 71.66       | 45.08       | 189.33      | 402.82      | 137.41      | 51.81       | 8.40        | 28.31       | 114.23      | 455.82      | 11.35       | 3.14        | 0.78       | 151.06      |

|                         |             |             |             |             |             |             |             |            |             |             |             |             |             |            |             |            |             |
|-------------------------|-------------|-------------|-------------|-------------|-------------|-------------|-------------|------------|-------------|-------------|-------------|-------------|-------------|------------|-------------|------------|-------------|
| 4°C-24h-4               | 66.82       | 125.81      | 186.39      | 65.16       | 45.82       | 202.08      | 364.53      | 152.49     | 45.35       | 11.61       | 27.38       | 68.43       | 319.80      | 13.19      | 2.97        | 0.79       | 193.55      |
| mean                    | 84.37       | 114.65      | 140.52      | 68.21       | 43.49       | 196.01      | 361.47      | 154.90     | 48.88       | 11.16       | 27.09       | 103.45      | 394.74      | 10.31      | 3.21        | 0.73       | 176.11      |
| SD                      | 12.53       | 9.17        | 36.38       | 5.42        | 2.53        | 8.13        | 30.03       | 32.12      | 2.70        | 4.43        | 0.95        | 28.27       | 56.11       | 2.39       | 0.62        | 0.07       | 22.77       |
| T-test                  | 0.00        | 0.04        | 0.09        | 0.04        | 0.00        | 0.04        | 0.00        | 0.91       | 0.14        | 0.02        | 0.00        | 0.79        | 0.03        | 0.39       | 0.03        | 0.00       | 0.00        |
| <b>change ratio (%)</b> | <b>171%</b> | <b>124%</b> | <b>137%</b> | <b>122%</b> | <b>123%</b> | <b>117%</b> | <b>149%</b> | <b>98%</b> | <b>116%</b> | <b>696%</b> | <b>266%</b> | <b>107%</b> | <b>139%</b> | <b>86%</b> | <b>146%</b> | <b>46%</b> | <b>157%</b> |

**Table S2** The concentration and change ratio of 18 amino acids which changed significantly ( $p < 0.05$ ) after serum specimens incubated at 22 °C for 24h.

| Temperature and delay time | Analyte ( $\mu\text{mol/L}$ ) |             |             |             |             |             |             |             |             |             |             |             |             |             |             |             |             |            |
|----------------------------|-------------------------------|-------------|-------------|-------------|-------------|-------------|-------------|-------------|-------------|-------------|-------------|-------------|-------------|-------------|-------------|-------------|-------------|------------|
|                            | His                           | Ile         | Leu         | Lys         | Met         | Phe         | Thr         | Trp         | Val         | Asn         | Asp         | Glu         | Gln         | Orn         | Cys         | Ala         | 3MHis       | PEtN       |
| 0h-1                       | 61.02                         | 35.81       | 80.82       | 108.65      | 29.22       | 54.64       | 182.80      | 30.33       | 160.47      | 62.26       | 2.24        | 7.45        | 574.30      | 33.42       | 112.17      | 216.87      | 1.85        | 1.29       |
| 0h-2                       | 57.85                         | 41.93       | 88.25       | 101.16      | 28.00       | 51.86       | 164.22      | 34.72       | 163.05      | 38.83       | 1.34        | 9.71        | 669.98      | 31.54       | 78.64       | 299.41      | 2.30        | 1.53       |
| 0h-3                       | 46.26                         | 49.81       | 103.85      | 92.96       | 31.79       | 62.05       | 187.42      | 39.45       | 181.50      | 66.36       | 0.68        | 14.01       | 710.53      | 36.86       | 79.71       | 343.24      | 2.61        | 1.79       |
| 0h-4                       | 31.91                         | 42.17       | 96.34       | 106.79      | 29.60       | 55.82       | 105.05      | 36.46       | 166.28      | 57.14       | 2.16        | 9.55        | 539.71      | 32.82       | 115.24      | 276.87      | 2.06        | 1.77       |
| mean                       | 49.26                         | 42.43       | 92.31       | 102.39      | 29.65       | 56.09       | 159.87      | 35.24       | 167.82      | 56.15       | 1.60        | 10.18       | 623.63      | 33.66       | 96.44       | 284.10      | 2.20        | 1.59       |
| SD                         | 13.19                         | 5.73        | 9.96        | 7.05        | 1.58        | 4.31        | 37.90       | 3.81        | 9.42        | 12.14       | 0.74        | 2.76        | 79.95       | 2.27        | 19.98       | 52.61       | 0.32        | 0.24       |
| 22°C-1h-1                  | 84.51                         | 49.53       | 113.20      | 120.97      | 30.20       | 59.07       | 156.89      | 33.04       | 169.03      | 68.15       | 4.99        | 12.30       | 467.53      | 19.93       | 79.48       | 261.56      | 3.27        | 1.78       |
| 22°C-1h-2                  | 84.87                         | 41.46       | 83.64       | 139.82      | 23.87       | 51.49       | 92.40       | 28.58       | 182.96      | 48.02       | 3.30        | 11.48       | 583.33      | 29.69       | 74.56       | 324.72      | 2.20        | 0.99       |
| 22°C-1h-3                  | 43.38                         | 43.46       | 102.04      | 124.53      | 31.76       | 59.93       | 148.30      | 42.63       | 185.62      | 75.46       | 4.58        | 13.09       | 403.51      | 37.43       | 78.53       | 239.60      | 2.42        | 1.29       |
| 22°C-1h-4                  | 42.81                         | 52.95       | 108.95      | 123.66      | 36.58       | 69.70       | 130.93      | 45.91       | 212.67      | 59.59       | 5.33        | 15.99       | 542.97      | 53.07       | 148.27      | 389.16      | 3.26        | 1.45       |
| mean                       | 63.89                         | 46.85       | 101.96      | 127.24      | 30.60       | 60.05       | 132.13      | 37.54       | 187.57      | 62.80       | 4.55        | 13.22       | 499.34      | 35.03       | 95.21       | 303.76      | 2.79        | 1.38       |
| SD                         | 24.02                         | 5.32        | 13.05       | 8.52        | 5.25        | 7.47        | 28.60       | 8.09        | 18.25       | 11.80       | 0.89        | 1.96        | 79.90       | 14.00       | 35.44       | 67.41       | 0.56        | 0.33       |
| T-test                     | 0.12                          | 0.42        | 0.34        | 0.03        | 0.71        | 0.35        | 0.27        | 0.52        | 0.13        | 0.03        | 0.01        | 0.16        | 0.15        | 0.86        | 0.93        | 0.69        | 0.26        | 0.43       |
| <b>change ratio (%)</b>    | <b>130%</b>                   | <b>110%</b> | <b>110%</b> | <b>124%</b> | <b>103%</b> | <b>107%</b> | <b>83%</b>  | <b>107%</b> | <b>112%</b> | <b>112%</b> | <b>284%</b> | <b>130%</b> | <b>80%</b>  | <b>104%</b> | <b>99%</b>  | <b>107%</b> | <b>127%</b> | <b>86%</b> |
| 22°C-2h-1                  | 58.87                         | 47.16       | 117.81      | 179.17      | 39.87       | 67.36       | 147.89      | 46.70       | 169.18      | 40.73       | 6.15        | 17.19       | 811.48      | 27.39       | 124.68      | 449.90      | 1.98        | 1.41       |
| 22°C-2h-2                  | 67.68                         | 45.19       | 86.73       | 112.12      | 33.61       | 50.97       | 219.86      | 38.16       | 182.42      | 50.42       | 5.46        | 12.54       | 1020.62     | 45.18       | 73.27       | 348.84      | 3.95        | 1.57       |
| 22°C-2h-3                  | 57.54                         | 52.94       | 99.59       | 101.09      | 37.42       | 57.85       | 97.38       | 36.75       | 183.55      | 48.58       | 3.64        | 19.92       | 563.47      | 38.80       | 97.30       | 277.61      | 2.96        | 1.61       |
| 22°C-2h-4                  | 93.40                         | 51.67       | 106.77      | 148.21      | 31.68       | 59.39       | 175.32      | 40.10       | 200.79      | 70.95       | 4.15        | 14.48       | 681.72      | 54.55       | 122.26      | 244.70      | 3.49        | 1.36       |
| mean                       | 69.37                         | 49.24       | 102.73      | 135.15      | 35.64       | 58.89       | 160.11      | 40.43       | 183.99      | 52.67       | 4.85        | 16.03       | 769.32      | 41.48       | 104.38      | 330.26      | 3.09        | 1.49       |
| SD                         | 16.64                         | 3.67        | 13.03       | 35.58       | 3.69        | 6.73        | 51.27       | 4.40        | 12.97       | 12.89       | 1.16        | 3.22        | 195.77      | 11.40       | 24.15       | 90.83       | 0.85        | 0.12       |
| T-test                     | 0.25                          | 0.05        | 0.35        | 0.11        | 0.04        | 0.50        | 1.00        | 0.29        | 0.11        | 0.74        | 0.01        | 0.03        | 0.26        | 0.29        | 0.21        | 0.54        | 0.10        | 0.44       |
| <b>change ratio (%)</b>    | <b>141%</b>                   | <b>116%</b> | <b>111%</b> | <b>132%</b> | <b>120%</b> | <b>105%</b> | <b>100%</b> | <b>115%</b> | <b>110%</b> | <b>94%</b>  | <b>302%</b> | <b>158%</b> | <b>123%</b> | <b>123%</b> | <b>108%</b> | <b>116%</b> | <b>140%</b> | <b>93%</b> |
| 22°C-4h-1                  | 108.38                        | 49.08       | 111.76      | 134.34      | 29.45       | 72.13       | 209.70      | 37.64       | 197.53      | 34.87       | 11.44       | 20.82       | 625.32      | 33.50       | 59.07       | 411.42      | 2.36        | 1.04       |

|                         |             |             |             |             |             |             |             |             |             |            |             |             |             |             |            |             |             |            |
|-------------------------|-------------|-------------|-------------|-------------|-------------|-------------|-------------|-------------|-------------|------------|-------------|-------------|-------------|-------------|------------|-------------|-------------|------------|
| 22°C-4h-2               | 95.65       | 55.10       | 131.13      | 120.22      | 28.38       | 65.53       | 206.28      | 37.24       | 177.00      | 61.28      | 10.43       | 13.20       | 742.39      | 71.84       | 103.08     | 389.51      | 1.94        | 1.10       |
| 22°C-4h-3               | 79.08       | 56.42       | 109.30      | 149.53      | 29.62       | 69.91       | 191.63      | 42.84       | 187.17      | 52.65      | 12.27       | 18.29       | 553.81      | 30.70       | 51.39      | 389.58      | 3.07        | 1.02       |
| 22°C-4h-4               | 73.52       | 48.59       | 118.24      | 135.79      | 31.75       | 59.45       | 154.98      | 35.79       | 202.65      | 58.84      | 11.68       | 30.60       | 811.56      | 45.83       | 110.18     | 404.34      | 2.56        | 0.70       |
| mean                    | 89.16       | 52.30       | 117.61      | 134.97      | 29.80       | 66.75       | 190.65      | 38.38       | 191.09      | 51.91      | 11.46       | 20.73       | 683.27      | 45.47       | 80.93      | 398.71      | 2.48        | 0.97       |
| SD                      | 15.89       | 4.04        | 9.77        | 11.98       | 1.41        | 5.59        | 25.04       | 3.08        | 11.39       | 11.93      | 0.77        | 7.30        | 115.57      | 18.77       | 29.98      | 10.97       | 0.47        | 0.18       |
| T-test                  | 0.00        | 0.01        | 0.05        | 0.03        | 0.88        | 0.04        | 0.06        | 0.15        | 0.06        | 0.72       | 0.00        | 0.08        | 0.54        | 0.33        | 0.42       | 0.04        | 0.28        | 0.04       |
| <b>change ratio (%)</b> | <b>181%</b> | <b>123%</b> | <b>127%</b> | <b>132%</b> | <b>100%</b> | <b>119%</b> | <b>119%</b> | <b>109%</b> | <b>114%</b> | <b>92%</b> | <b>715%</b> | <b>204%</b> | <b>110%</b> | <b>135%</b> | <b>84%</b> | <b>140%</b> | <b>113%</b> | <b>61%</b> |
| 22°C-8h-1               | 35.02       | 36.30       | 78.80       | 98.18       | 21.62       | 55.47       | 100.30      | 29.90       | 163.51      | 34.56      | 7.81        | 19.17       | 613.79      | 37.47       | 83.15      | 271.32      | 1.67        | 0.61       |
| 22°C-8h-2               | 49.34       | 35.86       | 82.92       | 84.52       | 23.58       | 59.60       | 151.74      | 32.50       | 156.99      | 39.49      | 8.18        | 19.90       | 430.26      | 36.76       | 51.00      | 288.40      | 2.68        | 0.61       |
| 22°C-8h-3               | 72.82       | 50.61       | 111.35      | 129.02      | 33.41       | 70.28       | 200.87      | 36.90       | 193.72      | 71.06      | 12.23       | 32.02       | 984.57      | 46.96       | 40.31      | 318.60      | 2.69        | 0.98       |
| 22°C-8h-4               | 78.46       | 42.77       | 96.69       | 126.55      | 23.49       | 53.97       | 171.34      | 33.98       | 195.80      | 52.26      | 11.26       | 20.63       | 603.38      | 39.84       | 70.90      | 176.82      | 4.08        | 0.60       |
| mean                    | 58.91       | 41.38       | 92.44       | 109.57      | 25.52       | 59.83       | 156.06      | 33.32       | 177.51      | 49.34      | 9.87        | 22.93       | 658.00      | 40.26       | 61.34      | 263.78      | 2.78        | 0.70       |
| SD                      | 20.31       | 6.92        | 14.75       | 21.79       | 5.33        | 7.36        | 42.31       | 2.92        | 20.12       | 16.29      | 2.21        | 6.09        | 233.42      | 4.66        | 19.29      | 61.18       | 0.99        | 0.19       |
| T-test                  | 0.60        | 0.58        | 0.97        | 0.61        | 0.13        | 0.23        | 0.91        | 0.03        | 0.29        | 0.42       | 0.01        | 0.01        | 0.77        | 0.02        | 0.00       | 0.57        | 0.33        | 0.00       |
| <b>change ratio (%)</b> | <b>120%</b> | <b>98%</b>  | <b>100%</b> | <b>107%</b> | <b>86%</b>  | <b>107%</b> | <b>98%</b>  | <b>95%</b>  | <b>106%</b> | <b>88%</b> | <b>616%</b> | <b>225%</b> | <b>106%</b> | <b>120%</b> | <b>64%</b> | <b>93%</b>  | <b>126%</b> | <b>44%</b> |
| 22°C-12h-1              | 50.83       | 41.24       | 93.88       | 175.88      | 30.36       | 62.19       | 127.27      | 36.05       | 181.61      | 66.68      | 6.45        | 19.23       | 484.18      | 43.94       | 102.12     | 307.41      | 3.40        | 0.79       |
| 22°C-12h-2              | 51.79       | 47.80       | 111.33      | 151.81      | 30.74       | 67.16       | 131.38      | 33.85       | 195.28      | 39.13      | 13.16       | 29.19       | 556.23      | 42.48       | 82.28      | 327.01      | 3.81        | 0.58       |
| 22°C-12h-3              | 61.65       | 43.87       | 91.15       | 150.54      | 30.79       | 65.12       | 112.45      | 33.92       | 193.60      | 64.68      | 12.33       | 29.10       | 482.97      | 59.04       | 80.07      | 298.11      | 0.00        | 0.66       |
| 22°C-12h-4              | 23.60       | 38.33       | 83.10       | 121.12      | 31.88       | 54.24       | 90.43       | 27.50       | 149.32      | 37.34      | 11.15       | 15.33       | 591.13      | 40.37       | 111.04     | 277.36      | 1.28        | 0.62       |
| mean                    | 46.97       | 42.81       | 94.86       | 149.84      | 30.94       | 62.18       | 115.38      | 32.83       | 179.95      | 51.96      | 10.77       | 23.21       | 528.63      | 46.46       | 93.88      | 302.47      | 2.83        | 0.66       |
| SD                      | 16.33       | 4.02        | 11.89       | 22.41       | 0.65        | 5.67        | 18.51       | 3.70        | 21.31       | 15.89      | 3.00        | 7.03        | 53.94       | 8.52        | 15.14      | 20.62       | 1.80        | 0.09       |
| T-test                  | 0.73        | 0.91        | 0.80        | 0.03        | 0.22        | 0.19        | 0.04        | 0.50        | 0.33        | 0.49       | 0.01        | 0.02        | 0.20        | 0.03        | 0.45       | 0.56        | 0.94        | 0.01       |
| <b>change ratio (%)</b> | <b>95%</b>  | <b>101%</b> | <b>103%</b> | <b>146%</b> | <b>104%</b> | <b>111%</b> | <b>72%</b>  | <b>93%</b>  | <b>107%</b> | <b>93%</b> | <b>672%</b> | <b>228%</b> | <b>85%</b>  | <b>138%</b> | <b>97%</b> | <b>106%</b> | <b>128%</b> | <b>42%</b> |
| 22°C-24h-1              | 106.76      | 54.77       | 118.03      | 153.43      | 41.16       | 78.77       | 202.06      | 43.18       | 195.82      | 43.94      | 9.33        | 96.75       | 692.92      | 47.42       | 57.06      | 323.70      | 2.56        | 0.00       |
| 22°C-24h-2              | 86.60       | 51.23       | 99.43       | 140.42      | 32.50       | 63.42       | 117.22      | 38.60       | 195.85      | 36.90      | 8.93        | 28.24       | 693.25      | 45.91       | 43.64      | 311.45      | 3.46        | 0.16       |
| 22°C-24h-3              | 105.63      | 60.59       | 137.78      | 182.07      | 43.36       | 80.63       | 192.15      | 42.49       | 187.31      | 57.10      | 8.01        | 36.51       | 915.43      | 72.67       | 51.97      | 420.14      | 3.33        | 0.34       |
| 22°C-24h-4              | 95.35       | 51.79       | 118.78      | 188.19      | 42.03       | 72.01       | 133.05      | 34.54       | 210.30      | 58.83      | 14.41       | 26.60       | 676.13      | 72.42       | 30.56      | 530.76      | 3.03        | 0.00       |

|                         |             |             |             |             |             |             |             |             |             |            |             |             |             |             |            |             |             |            |
|-------------------------|-------------|-------------|-------------|-------------|-------------|-------------|-------------|-------------|-------------|------------|-------------|-------------|-------------|-------------|------------|-------------|-------------|------------|
| mean                    | 98.58       | 54.59       | 118.51      | 166.03      | 39.76       | 73.71       | 161.12      | 39.70       | 197.32      | 49.19      | 10.17       | 47.03       | 744.43      | 59.61       | 45.81      | 396.51      | 3.09        | 0.25       |
| SD                      | 9.50        | 4.29        | 15.66       | 22.83       | 4.92        | 7.79        | 42.25       | 3.99        | 9.54        | 10.55      | 2.88        | 33.43       | 114.28      | 14.95       | 11.57      | 101.85      | 0.40        | 0.16       |
| T-test                  | 0.01        | 0.01        | 0.02        | 0.02        | 0.01        | 0.01        | 0.95        | 0.24        | 0.04        | 0.21       | 0.01        | 0.13        | 0.05        | 0.03        | 0.03       | 0.12        | 0.00        | 0.00       |
| <b>change ratio (%)</b> | <b>200%</b> | <b>129%</b> | <b>128%</b> | <b>162%</b> | <b>134%</b> | <b>131%</b> | <b>101%</b> | <b>113%</b> | <b>118%</b> | <b>88%</b> | <b>634%</b> | <b>462%</b> | <b>119%</b> | <b>177%</b> | <b>47%</b> | <b>140%</b> | <b>140%</b> | <b>16%</b> |

**Table S3-1** The concentration and change ratio of 14 amino acids in the serum altered after three freeze-thaw cycles compared with the samples without freeze-thaw process ( $p < 0.05$ ). The freeze-thaw cycle including samples were brought from  $-80\text{ }^{\circ}\text{C}$ , placed at  $4\text{ }^{\circ}\text{C}$  for one hour and delivered to  $-80\text{ }^{\circ}\text{C}$  for 12 hours.

| sample style                   | Analyte ( $\mu\text{mol/L}$ ) |               |                |               |               |               |               |                |                |               |               |               |                |                |               |
|--------------------------------|-------------------------------|---------------|----------------|---------------|---------------|---------------|---------------|----------------|----------------|---------------|---------------|---------------|----------------|----------------|---------------|
|                                | Arg                           | His           | Ile            | Leu           | Lys           | Met           | Phe           | Glu            | Gln            | Thr           | Trp           | Val           | Gly            | Ser            | Ala           |
| 0h-sample-1                    | 82.78                         | 61.02         | 35.81          | 80.82         | 108.65        | 29.22         | 54.64         | 7.45           | 574.30         | 182.80        | 30.33         | 160.47        | 236.42         | 145.47         | 216.87        |
| 0h-sample-2                    | 69.45                         | 57.85         | 41.93          | 88.25         | 101.16        | 28.00         | 51.86         | 9.71           | 669.98         | 164.22        | 34.72         | 163.05        | 237.33         | 140.03         | 299.41        |
| 0h-sample-3                    | 102.10                        | 46.26         | 49.81          | 103.85        | 92.96         | 31.79         | 62.05         | 14.01          | 710.53         | 187.42        | 39.45         | 181.50        | 295.67         | 187.40         | 343.24        |
| 0h-sample-4                    | 127.54                        | 31.91         | 42.17          | 96.34         | 106.79        | 29.60         | 55.82         | 9.55           | 539.71         | 105.05        | 36.46         | 166.28        | 200.44         | 157.07         | 276.87        |
| 0h-sample-mean                 | 95.47                         | 49.26         | 42.43          | 92.31         | 102.39        | 29.65         | 56.09         | 10.18          | 623.63         | 159.87        | 35.24         | 167.82        | 242.47         | 157.49         | 284.10        |
| SD                             | 25.24                         | 13.19         | 5.73           | 9.96          | 7.05          | 1.58          | 4.31          | 2.76           | 79.95          | 37.90         | 3.81          | 9.42          | 39.41          | 21.17          | 52.61         |
| freeze-thaw cycles-sample-1    | 110.15                        | 114.18        | 92.76          | 190.90        | 205.93        | 44.40         | 65.32         | 43.90          | 673.37         | 257.71        | 49.16         | 270.74        | 183.53         | 180.78         | 414.83        |
| freeze-thaw cycles-sample-2    | 100.30                        | 100.00        | 84.42          | 169.97        | 90.14         | 40.63         | 60.22         | 31.92          | 485.66         | 216.15        | 46.15         | 271.53        | 204.60         | 169.92         | 353.04        |
| freeze-thaw cycles-sample-3    | 97.89                         | 60.59         | 98.13          | 178.57        | 160.28        | 44.23         | 69.68         | 35.07          | 340.71         | 115.91        | 51.54         | 274.76        | 270.59         | 101.97         | 391.84        |
| freeze-thaw cycles-sample-4    | 123.62                        | 81.22         | 75.33          | 176.85        | 217.96        | 53.07         | 60.70         | 32.48          | 459.33         | 115.92        | 41.57         | 281.87        | 209.77         | 80.73          | 420.20        |
| freeze-thaw cycles-sample-mean | 107.99                        | 89.00         | 87.66          | 179.07        | 168.58        | 45.58         | 63.98         | 35.84          | 489.77         | 176.42        | 47.11         | 274.72        | 217.12         | 133.35         | 394.98        |
| SD                             | 11.69                         | 23.26         | 9.97           | 8.72          | 57.90         | 5.29          | 4.44          | 5.54           | 137.68         | 71.90         | 4.30          | 5.07          | 37.41          | 49.47          | 30.54         |
| T-test                         | 0.28                          | 0.02          | 0.00           | 0.00          | 0.09          | 0.01          | 0.01          | 0.01           | 0.27           | 0.64          | 0.02          | 0.00          | 0.15           | 0.52           | 0.06          |
| <b>change ratio (%)</b>        | <b>13.12%</b>                 | <b>80.66%</b> | <b>106.60%</b> | <b>93.98%</b> | <b>64.64%</b> | <b>53.72%</b> | <b>14.06%</b> | <b>252.12%</b> | <b>-21.47%</b> | <b>10.35%</b> | <b>33.68%</b> | <b>63.70%</b> | <b>-10.45%</b> | <b>-15.33%</b> | <b>39.03%</b> |

**Table S3-2** The concentration and change ratio of 14 amino acids in the serum altered after three freeze-thaw cycles compared with the samples without freeze-thaw process ( $p < 0.05$ ). The freeze-thaw cycle including samples were brought from  $-80\text{ }^{\circ}\text{C}$ , placed at  $4\text{ }^{\circ}\text{C}$  for one hour and delivered to  $-80\text{ }^{\circ}\text{C}$  for 12 hours.

| sample style                   | Analyte ( $\mu\text{mol/L}$ ) |        |        |         |        |         |        |        |                   |                   |        |        |       |         |       |         |
|--------------------------------|-------------------------------|--------|--------|---------|--------|---------|--------|--------|-------------------|-------------------|--------|--------|-------|---------|-------|---------|
|                                | Tau                           | Tyr    | Asn    | Cit     | Orn    | Cys     | Abu    | Pro    | $\beta\text{Ala}$ | $\beta\text{Aib}$ | EtN    | Hyp    | 1MHis | 3MHis   | PEtN  | Asp     |
| 0h-sample-1                    | 36.09                         | 43.12  | 62.26  | 18.14   | 33.42  | 112.17  | 9.01   | 117.91 | 11.88             | 1.66              | 11.24  | 7.34   | 1.83  | 1.85    | 1.29  | 2.24    |
| 0h-sample-2                    | 38.34                         | 42.94  | 38.83  | 45.92   | 31.54  | 78.64   | 15.90  | 108.97 | 10.57             | 0.60              | 8.77   | 6.86   | 1.81  | 2.30    | 1.53  | 1.34    |
| 0h-sample-3                    | 52.97                         | 52.68  | 66.36  | 71.23   | 36.86  | 79.71   | 20.45  | 96.49  | 15.52             | 0.92              | 12.97  | 6.67   | 1.25  | 2.61    | 1.79  | 0.68    |
| 0h-sample-4                    | 41.78                         | 58.51  | 57.14  | 17.86   | 32.82  | 115.24  | 11.68  | 124.27 | 10.01             | 1.65              | 16.15  | 6.23   | 2.36  | 2.06    | 1.77  | 2.16    |
| 0h-sample-mean                 | 42.29                         | 49.31  | 56.15  | 38.29   | 33.66  | 96.44   | 14.26  | 111.91 | 12.00             | 1.21              | 12.28  | 6.77   | 1.81  | 2.20    | 1.59  | 1.60    |
| SD                             | 7.49                          | 7.64   | 12.14  | 25.61   | 2.27   | 19.98   | 5.01   | 12.04  | 2.47              | 0.53              | 3.10   | 0.46   | 0.46  | 0.32    | 0.24  | 0.74    |
| freeze-thaw cycles-sample-1    | 63.37                         | 61.69  | 53.38  | 25.19   | 50.00  | 65.42   | 27.87  | 116.52 | 5.71              | 1.49              | 14.02  | 7.07   | 0.00  | 2.03    | 2.04  | 0.00    |
| freeze-thaw cycles-sample-2    | 71.52                         | 69.18  | 41.80  | 16.37   | 42.76  | 50.98   | 18.30  | 144.63 | 3.26              | 2.26              | 11.40  | 8.99   | 0.00  | 1.50    | 1.69  | 0.00    |
| freeze-thaw cycles-sample-3    | 64.92                         | 61.43  | 69.23  | 26.20   | 55.91  | 49.08   | 22.62  | 98.73  | 3.83              | 3.28              | 11.26  | 8.64   | 0.00  | 1.88    | 1.83  | 0.00    |
| freeze-thaw cycles-sample-4    | 55.05                         | 66.97  | 48.85  | 9.02    | 46.82  | 56.06   | 37.36  | 110.15 | 2.49              | 2.82              | 18.17  | 6.45   | 0.00  | 0.00    | 1.44  | 0.00    |
| freeze-thaw cycles-sample-mean | 63.71                         | 64.82  | 53.32  | 19.19   | 48.87  | 55.39   | 26.54  | 117.51 | 3.82              | 2.46              | 13.71  | 7.79   | 0.00  | 1.81    | 1.75  | 0.00    |
| SD                             | 6.77                          | 3.87   | 11.63  | 8.10    | 5.55   | 7.31    | 8.21   | 19.52  | 1.38              | 0.77              | 3.23   | 1.22   | 0.00  | 0.93    | 0.25  | 0.00    |
| T-test                         | 0.03                          | 0.04   | 0.46   | 0.19    | 0.00   | 0.01    | 0.13   | 0.63   | 0.01              | 0.10              | 0.27   | 0.20   | 0.00  | 0.16    | 0.53  | 0.02    |
| <b>change ratio (%)</b>        | 50.65%                        | 31.45% | -5.04% | -49.87% | 45.20% | -42.57% | 86.06% | 5.00%  | -68.14%           | 103.84%           | 11.65% | 14.95% | -100% | -17.97% | 9.84% | -100.0% |
